# Supplementary material for: A novel AIE-active camphor-based fluorescent probe for simultaneous detection of Al3+ and Zn2+ at dual channels in living cells and zebrafish
Source: Royal Society of Chemistry journal article supplement (doi:10.1039/d1an01733k), 2021-11-11
Supplement: d1an01733k1.pdf [file d1an01733k1.pdf]

*Supplementary materials*

**A novel AIE-active camphor-based fluorescent probe for simultaneous detection of Al<sup>3+</sup> and Zn<sup>2+</sup> at dual channels in living cells and zebrafish**

Shuai Gong <sup>a</sup>, Yan Zhang <sup>a</sup>, Ahui Qin <sup>a</sup>, Mingxin Li <sup>a</sup>, Yu Gao <sup>a</sup>, Chenglong Zhang <sup>a</sup>, Jie Song <sup>b</sup>, Xu Xu <sup>a</sup>, Zhonglong Wang <sup>a,\*</sup>, Shifa Wang <sup>a,\*</sup>

<sup>a</sup> *Co-Innovation Center of Efficient Processing and Utilization of Forest Resources, International Innovation Center for Forest Chemicals and Materials, College of Chemical Engineering, Nanjing Forestry University, Nanjing, 210037, China*

<sup>b</sup> *Department of Natural Sciences, University of Michigan-Flint, 303 E. Kearsley Street, Flint, MI, 48502, USA*

\*Corresponding author: Dr. and Prof. Shifa Wang

Phone: +86-25-85428369

Fax: +86-25-8548369

Email: wangshifa65@163.com

\*Corresponding author: Dr. Zhonglong Wang

Email: wang\_zhonglong@njfu.edu.cn

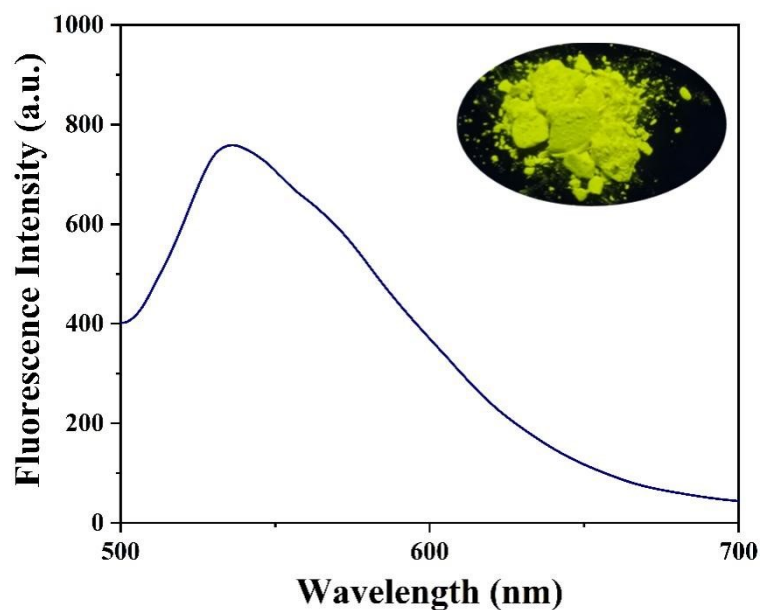

**Fig. S1.** Emission spectra of **PSH** in the solid state. Inset: The corresponding photograph of **PSH** in solid-state under 365 nm UV light.

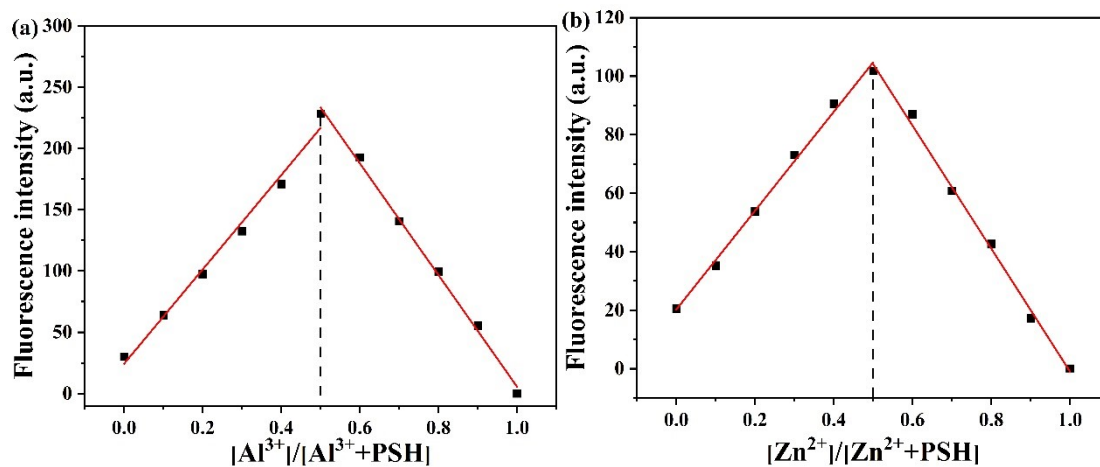

**Fig. S2.** Job's plot was obtained for **PSH** towards (a)  $\text{Al}^{3+}$  and (b)  $\text{Zn}^{2+}$  ions. The total concentration of **PSH** and  $\text{Al}^{3+}/\text{Zn}^{2+}$  was fixed at  $10 \mu\text{M}$ .

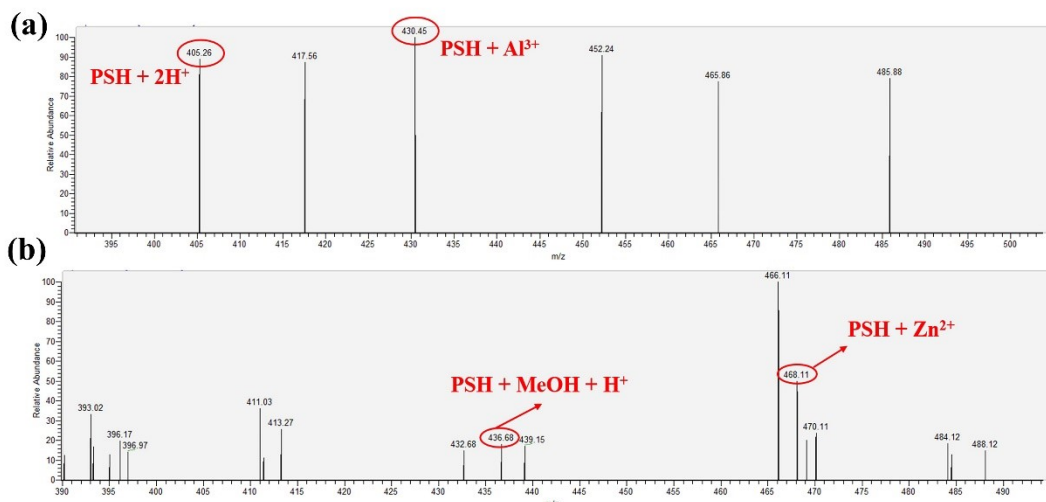

Fig. S3. (a) HRMS analysis of PSH-Al<sup>3+</sup> complex; (b) HRMS analysis of PSH-Zn<sup>2+</sup> complex.

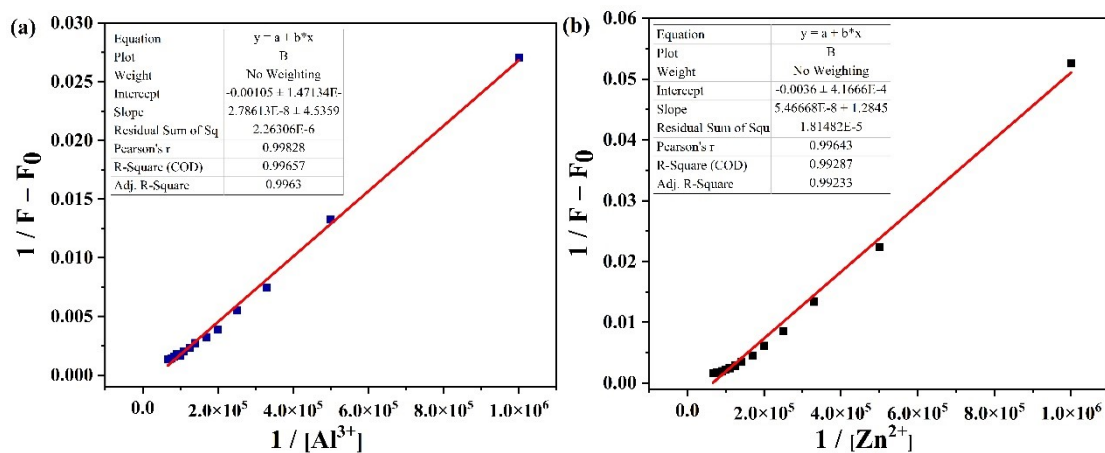

Fig. S4. Determination of the association constant of PSH at 500 nm or 555 nm depending on the Al<sup>3+</sup> or Zn<sup>2+</sup>.

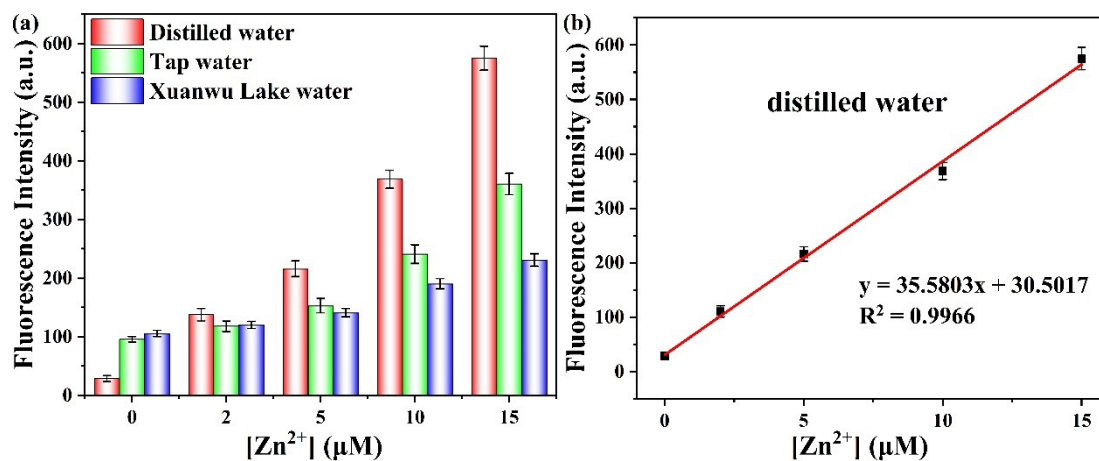

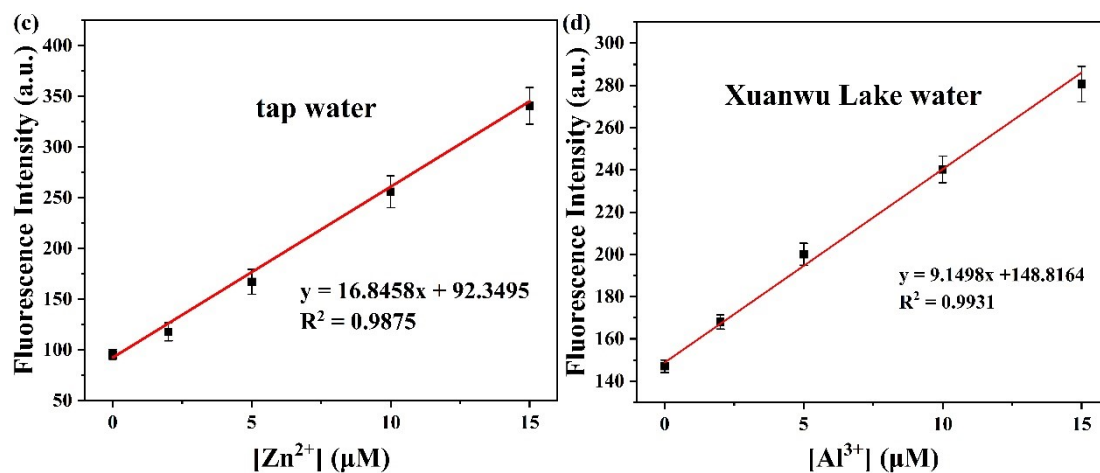

**Fig. S5.** (a) The fluorescence emission intensity of PSH towards different concentrations of  $Zn^{3+}$  in different water samples; The Linear plots between the PSH– $Zn^{2+}$  fluorescence intensity and different concentrations of  $Zn^{2+}$  in (b) distilled water, (c) tap water, and (d) Xuanwu Lake water.

**Table S1.** Determination results of PSH towards  $Zn^{2+}$  in three kinds of water samples.

| Water sample      | Added $Zn^{2+}$ ( $\mu M$ ) | Found $Zn^{2+}$ ( $\mu M$ ) | Recovery (%) |
|-------------------|-----------------------------|-----------------------------|--------------|
| Distilled water   | 0                           | Not detected                | –            |
|                   | 2                           | $2.24 \pm 0.26$             | 112.0        |
|                   | 5                           | $5.21 \pm 0.33$             | 104.2        |
|                   | 10                          | $9.49 \pm 0.41$             | 94.9         |
|                   | 15                          | $15.30 \pm 0.56$            | 102.0        |
| Tap water         | 0                           | $0.28 \pm 0.08$             | 0.0          |
|                   | 2                           | $1.81 \pm 0.42$             | 90.5         |
|                   | 5                           | $3.60 \pm 0.70$             | 72.0         |
|                   | 10                          | $8.81 \pm 0.83$             | 88.1         |
|                   | 15                          | $15.92 \pm 0.80$            | 106.1        |
| Xuanwu Lake water | 0                           | $0.51 \pm 0.12$             | 0.0          |
|                   | 2                           | $1.94 \pm 0.39$             | 97.0         |
|                   | 5                           | $4.43 \pm 0.50$             | 88.6         |
|                   | 10                          | $10.31 \pm 0.68$            | 103.1        |
|                   | 15                          | $15.13 \pm 0.87$            | 100.8        |

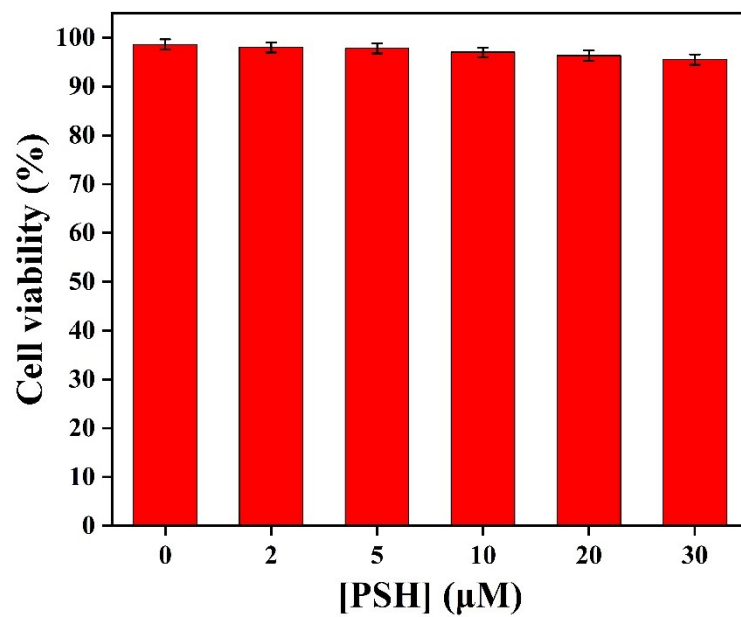

Fig. S6. Cytotoxicity assays of PSH in living HeLa cells.

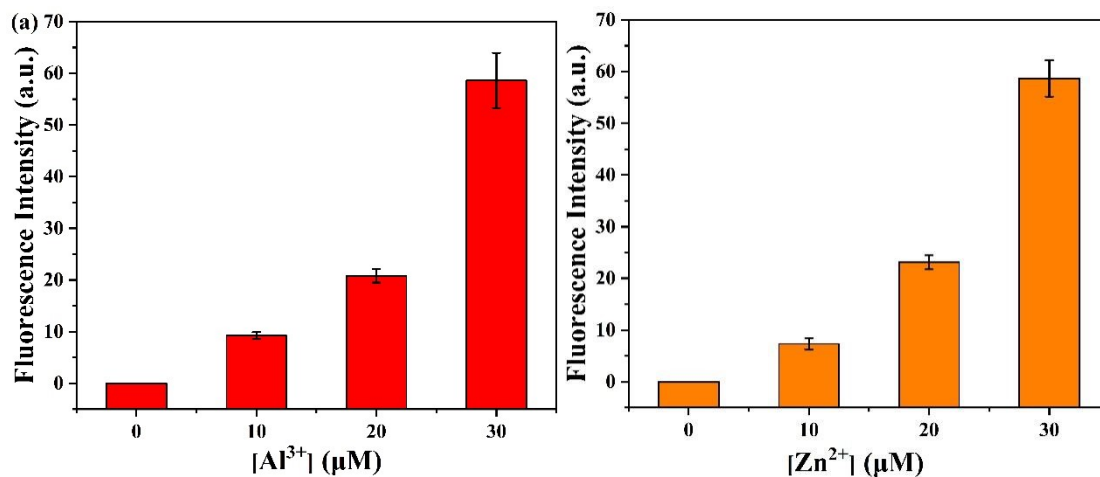

Fig. S7. Quantified fluorescence intensity in confocal fluorescence images (a), (d), (g), (j).

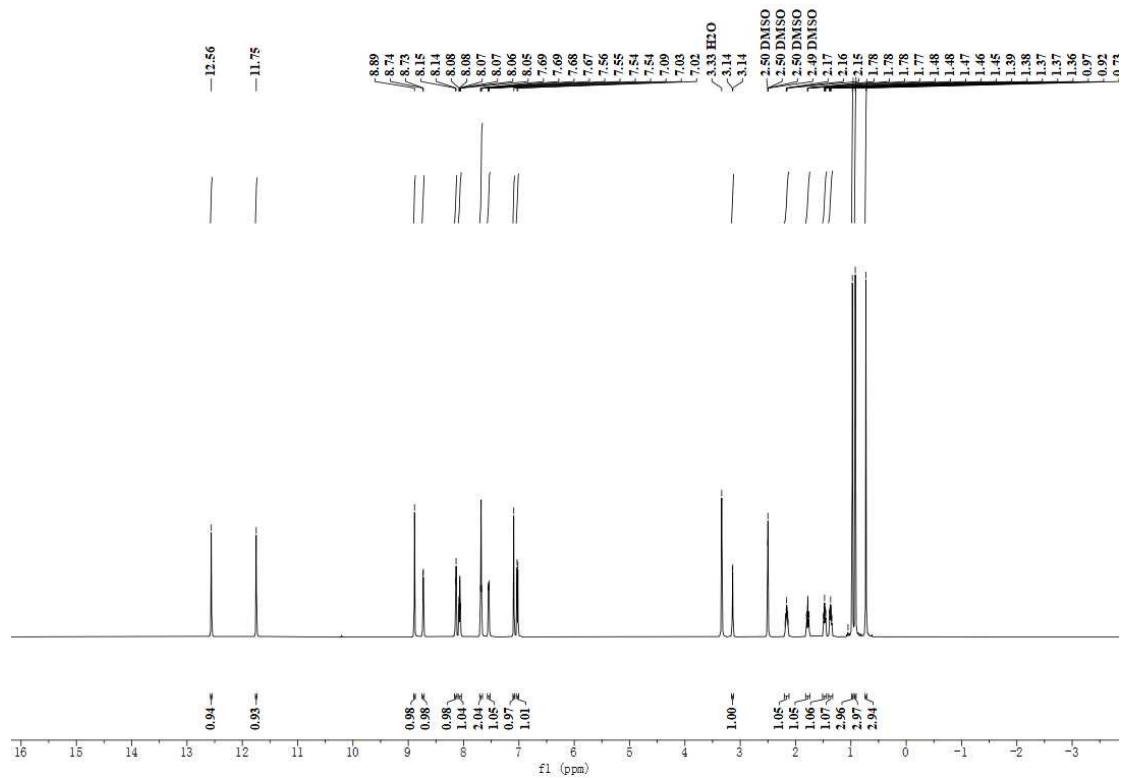

Fig. S8.  $^1\text{H}$  NMR spectra of compound PSH was tested in  $\text{DMSO}-d_6$  solutions with a Bruker AV 500 Spectrometer.

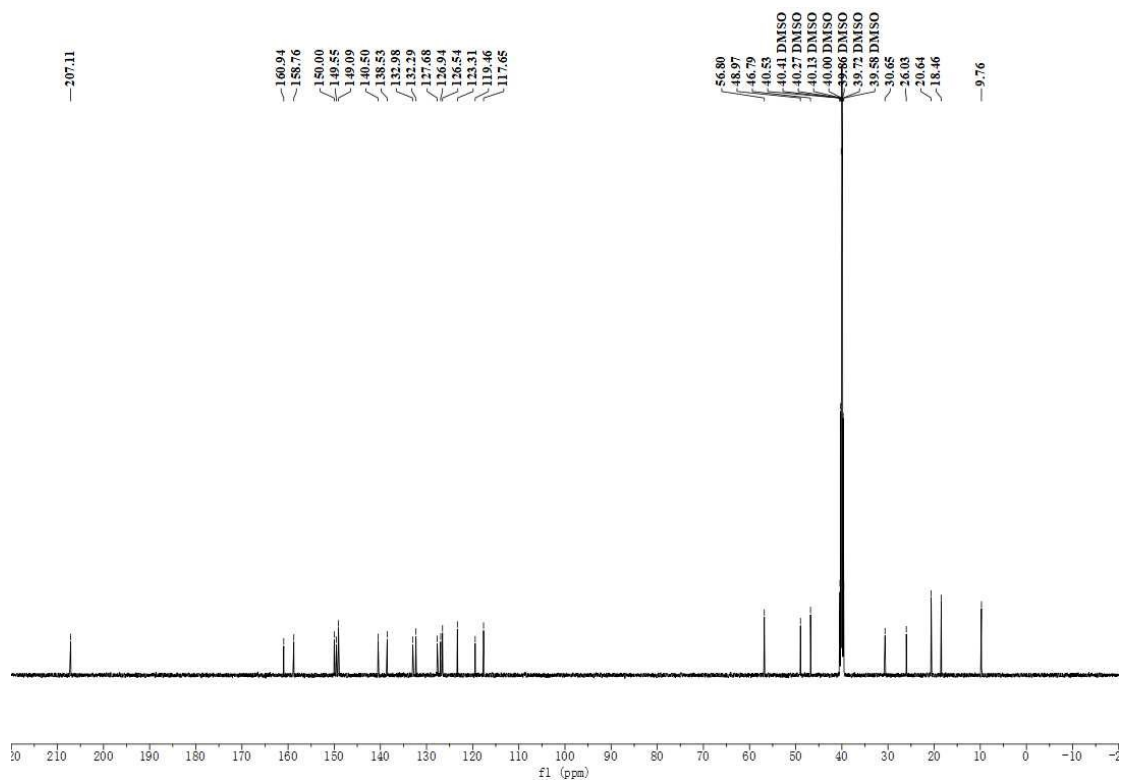

Fig. S9.  $^{13}\text{C}$  NMR spectra of compound PSH was tested in  $\text{DMSO}-d_6$  solutions with a Bruker AV 500 Spectrometer.

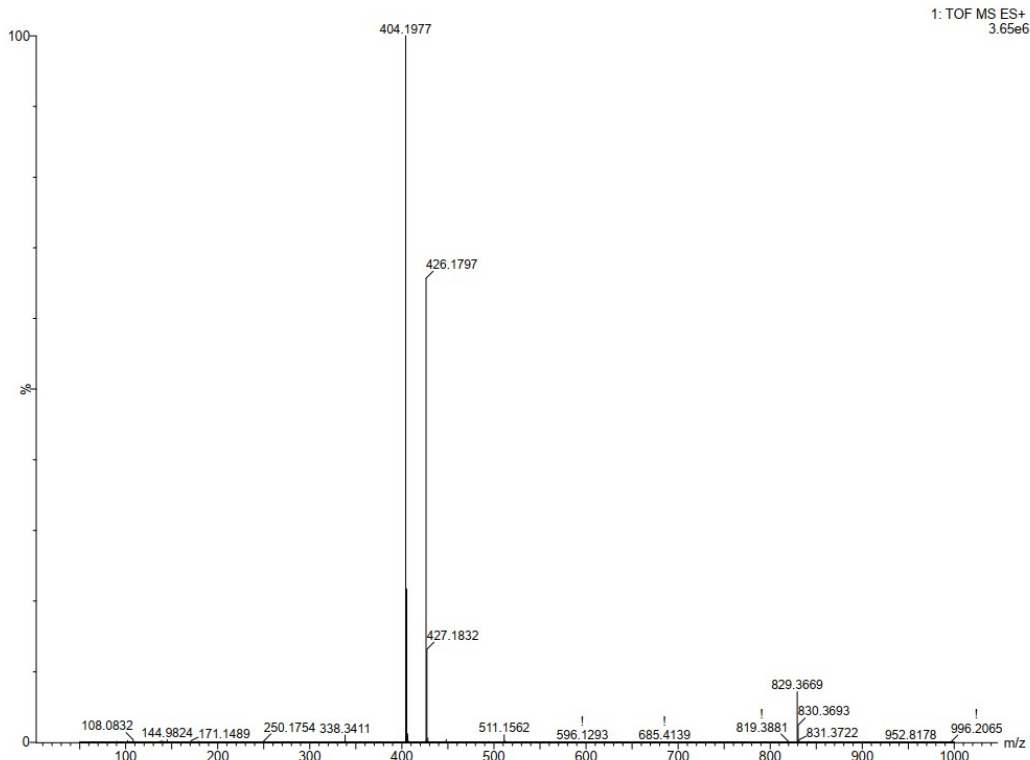

Fig. S10. HRMS spectra of compound PSH.

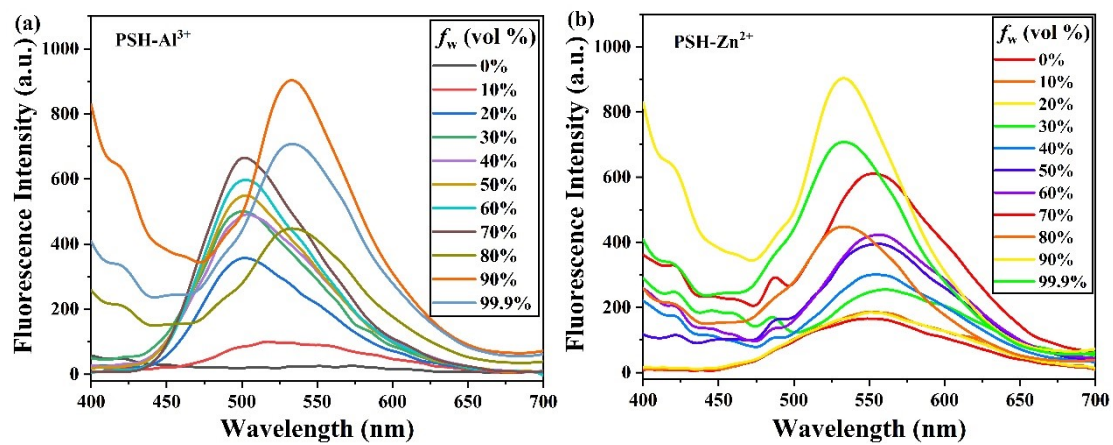

Fig. S11. (a) The fluorescence spectra PSH-Al<sup>3+</sup> (10  $\mu$ M,  $\lambda_{\text{ex}}$  = 365 nm) in ACN/ HEPES buffer solutions with the changed HEPES

buffer volume fractions.  $\lambda_{\text{ex}}$  = 365 nm. (b) The fluorescence spectra PSH-Zn<sup>2+</sup> (10  $\mu$ M,  $\lambda_{\text{ex}}$  = 365 nm) in ACN/ HEPES buffer

solutions with the changed HEPES buffer volume fractions.  $\lambda_{\text{ex}}$  = 365 nm.
